# Supplementary material
Source: publisher figshare collection journal article supplement (https://sage.figshare.com/ndownloader/files/14241224)
Supplement: Supplementary file 1 [file 14241224]

## Sheet: Sheet1
Lago Forano not in diagram
Species	zone 1	zone 2	zone 3	zone 4	zone 5	zone 6
Upland forest
Betula	•	•	•	•	•	•
Carpinus betulus		•	•	•
Corylus	•	•	•	•	•	•
Tilia	•	•	•	•	•	•
Ulmus	•	•		•	•	•
Upland secondary woodland
Ericaceae	•	•	•	•	•
Ilex	•			•		•
Ligustrum					•
Upland herbs
Asphodelus albus-type					•
Asteraceae liguliflorae	•	•	•	•	•	•
Asteraceae tubuliflorae	•			•	•	•
Campanula	•	•			•	•
Caryophyllaceae	•	•	•	•	•	•
Centaurea	•				•
Centaurea jacea-type	•	•		•	•	•
Centaurea solstitialis-type	•			•	•
Chenopodiaceae	•	•	•
Ephedra fragilis-type	•				•
Geranium	•		•	•		•
Helianthemum		•		•	•	•
Knautia	•	•
Matricaria	•			•	•	•
Plantago lanceolata-type	•	•		•		•
Polygonum aviculare	•	•	•	•	•	•
Potentilla				•	•	•
Ranunculus parviflorus-type	•	•		•	•
Ranunculus acris-type		•		•		•
Rumex acetosa-type	•	•		•	•	•
Salvia		•	•
Scrophularia/Verbascum-type			•			•
Senecio	•	•	•	•	•
Trifolium			•	•		•
Vicia type		•				•
Ophioglossum			•			•
Polypodium					•
Wetland herbs
Filipendula	•			•
Ecologically indeterminate
Apiaceae	•	•	•	•	•	•
Brassica	•	•	•	•	•
Epilobium	•			•		•
Fabaceae	•			•
Galium	•		•	•	•
Lysimachia	•	•		•		•
Polygonum bistorta-type	•					•
